# Supplementary material for: Deep Feature Stability Analysis Using CT Images of a Physical Phantom Across Scanner Manufacturers, Cartridges, Pixel Sizes, and Slice Thickness
Source: PubMed Central journal article supplement — Tomography. 2020 Jun;6(2):250–60. doi: 10.18383/j.tom.2020.00003 (PMC7289258; doi:10.18383/j.tom.2020.00003), 2020-06
Supplement: tom.2020.00003.sup.01.pdf [file tom.2020.00003.sup.01.pdf]

# APPENDIX

## Mean and Standard Deviation of Different Cartridges:

**Appendix Table 1.** HU Mean and Standard Deviation Value from Different Cartridges

| <b>Cartridge</b>   | <b>Scanners</b>            | <b>Mean</b> | <b>Standard Deviation</b> |
|--------------------|----------------------------|-------------|---------------------------|
| <b>Rubber</b>      | GE STE (GE1)               | -62.16      | 110.44                    |
|                    | GE 32 (GE2)                | -66.67      | 90.50                     |
|                    | Definition AS (S1)         | -80.66      | 103.13                    |
|                    | Siemens Sensation 64 (S2)  | -83.18      | 105.04                    |
|                    | Siemens Sensation 40 (S3)  | -84.71      | 107.90                    |
|                    | Siemens Sensation 16 (S4)  | -76.23      | 102.03                    |
|                    | Philips Big Bore (P1)      | -67.05      | 95.44                     |
|                    | Philips Brilliance 64 (P2) | -73.59      | 87.93                     |
| <b>Dense-Cork</b>  | GE STE (GE1)               | -677.88     | 35.45                     |
|                    | GE 32 (GE2)                | -681.32     | 28.30                     |
|                    | Definition AS (S1)         | -686.15     | 33.10                     |
|                    | Siemens Sensation 64 (S2)  | -688.76     | 34.50                     |
|                    | Siemens Sensation 40 (S3)  | -689.23     | 34.94                     |
|                    | Siemens Sensation 16 (S4)  | -682.43     | 32.83                     |
|                    | Philips Big Bore (P1)      | -677.02     | 32.10                     |
|                    | Philips Brilliance 64 (P2) | -679.35     | 29.75                     |
| <b>Normal-Cork</b> | GE STE (GE1)               | -507.20     | 49.65                     |
|                    | GE 32 (GE2)                | -508.74     | 43.51                     |
|                    | Definition AS (S1)         | -512.36     | 47.19                     |
|                    | Siemens Sensation 64 (S2)  | -516.28     | 47.58                     |
|                    | Siemens Sensation 40 (S3)  | -518.11     | 48.29                     |
|                    | Siemens Sensation 16 (S4)  | -511.47     | 46.12                     |
|                    | Philips Big Bore (P1)      | -506.15     | 44.98                     |
|                    | Philips Brilliance 64 (P2) | -506.60     | 42.96                     |

### **Prognostic Dataset Description:**

De-identified data from the National Lung Screening Trial (NLST) was obtained via data access system of National Cancer Institute. NLST was a multi-institutional based lung cancer screening trial which spanned for three years: a baseline scan (T0) and two follow-up scans one year apart. A nested case-control procedure with matched demographics from the NLST's LDCT arm was used for this study, that included screen detected lung cancers (SDLC) and nodule positive controls (NPC).

170 SDLCs were deduced with a positive nodule at baseline (T0) and then the lung cancer was diagnosed at T1 (85 cases) and T2 (85 cases). A 2:1 nested case control was used to choose 328 NPCs which had nodules (never diagnosed as cancer) that were followed from T0 to T2 and had similar demographics as SDLCs. The SDLC and NPC were then divided into two Cohorts: Cohort1 (to train the machine learning model) and Cohort2 (a separate set to evaluate the trained model). Cohort1 had 85 SDLCs and 176 NPCs, whereas Cohort2 consisted of 85 SDLCs and 152 NPCs. The SDLCs which had a positive baseline (T0) screen and the positively screened nodule became diagnosed with lung cancer at the first follow-up screen (T1). While, in Cohort 2, the positively screened nodules during the baseline scan (T0) became malignant after two years (T2). Figure 10 describes the NLST study timeline as well as the criteria for dividing the SDLCs and NPCs into Cohort1 and Cohort2. More details about the dataset can be found in [23, 24].

**Appendix Table 2.** Comparing Different Classifiers for Malignancy prediction using NLST dataset

| <b>Classifiers</b>      | <b># of Features</b> | <b>Original Deep Features (ALL 4096 Features) *</b> | <b>Stable deep features-normalized by pixel area #</b> |
|-------------------------|----------------------|-----------------------------------------------------|--------------------------------------------------------|
| <b>Naïve Bayes</b>      | Top 5                | 57.8 (0.61)                                         | 55.27 (0.68)                                           |
|                         | Top 10               | 50.2 (0.6)                                          | 54.85 (0.65)                                           |
|                         | Top 15               | 50.6 (0.57)                                         | 54.4 (0.64)                                            |
|                         | Top 20               | 51 (0.57)                                           | 54.85 (0.65)                                           |
|                         | Top 49 or All 49     | 45.14 (0.5)                                         | 54.85 (0.65)                                           |
| <b>Nearest Neighbor</b> | Top 5                | 64.1 (0.6)                                          | 66.244 (0.62)                                          |
|                         | Top 10               | 64.1 (0.6)                                          | 61.6 (0.62)                                            |
|                         | Top 15               | 63.7 (0.6)                                          | 64.13 (0.62)                                           |
|                         | Top 20               | 67.1 (0.62)                                         | 63.2 (0.62)                                            |
|                         | Top 49 or All 49     | 64.97 (0.61)                                        | 65.4 (0.64)                                            |
| <b>Decision Tree</b>    | Top 5                | 57.4 (0.51)                                         | 64.55 (0.63)                                           |
|                         | Top 10               | 64.1 (0.5)                                          | 64.55 (0.63)                                           |
|                         | Top 15               | 62.9 (0.52)                                         | 64.55 (0.64)                                           |
|                         | Top 20               | 62.9 (0.52)                                         | 64.97 (0.6)                                            |
|                         | Top 49 or All 49     | 62.86 (0.55)                                        | 63.29 (0.58)                                           |

\*Top 49 features were chosen here using feature selector.

#All 49 features were stable deep features obtained from rubber cartridge.
